# Supplementary material for: The Westward Journey of Alfalfa Leaf Curl Virus
Source: PubMed Central journal article supplement (PMC6212810; doi:10.3390/v10100542), 2018-10-04
Supplement: viruses-10-00542-s001.pdf [file viruses-10-00542-s001.pdf]

Supplementary Material

Supplementary Figure 1

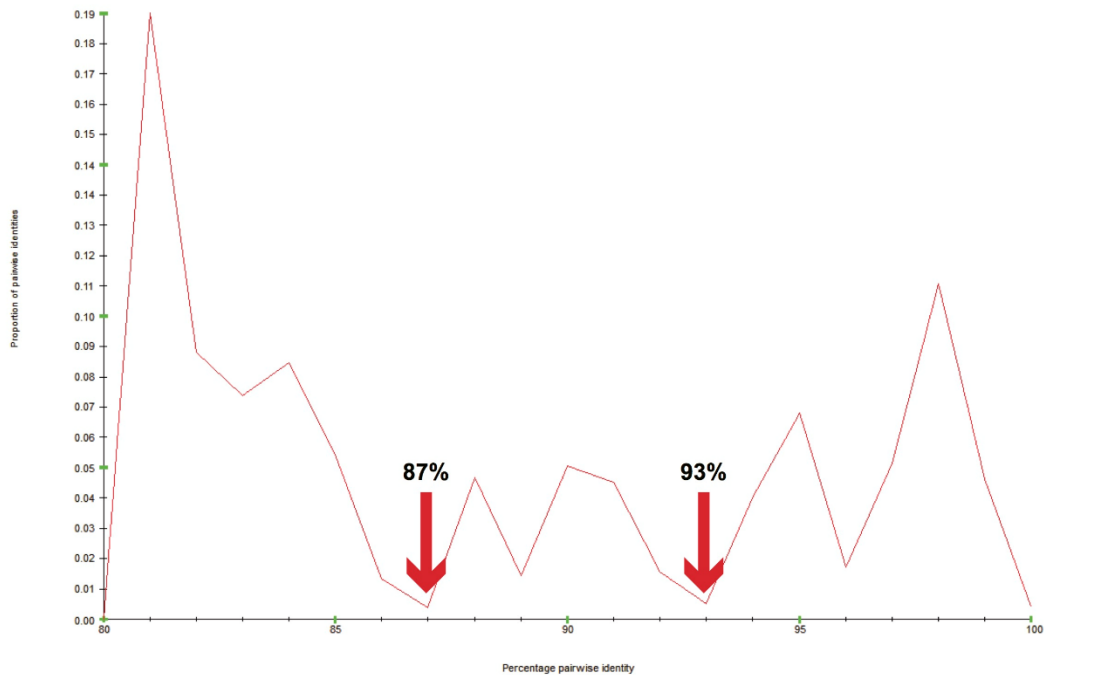

**Figure S1.** Percentage pairwise identities of 120 complete genome sequences of alfalfa leaf curl virus. Sequence demarcation thresholds at 87% and 93% are indicated with a red arrow

**Table S1.** Features of the 120 ALCV isolates analyzed in this study.

| Isolate                 | Country   | Region              | Locality         | GPS Coordinates             | Year | Acc. number | Strain | Reference            |
|-------------------------|-----------|---------------------|------------------|-----------------------------|------|-------------|--------|----------------------|
| BsAs1_Guamini           | Argentina | Buenos Aires        | Guamini          | 36°53'54.60"S 62°23'31.20"W | 2017 | MG792034    | D      | This study           |
| BsAs2_Saladillo         | Argentina | Buenos Aires        | Saladillo        | 35°40'19.56"S 59°48'44.64"W | 2011 | MG792038    | D      | This study           |
| BsAs3_Pergamino         | Argentina | Buenos Aires        | Pergamino        | 33°54'58.32"S 60°34'18.12"W | 2011 | MG792045    | D      | This study           |
| BsAs4_Hilario_Ascasubi  | Argentina | Buenos Aires        | Hilario Ascasubi | 39°23'33.36"S 62°37'41.88"W | 2015 | MG792047    | D      | This study           |
| BsAs5_Piedritas         | Argentina | Buenos Aires        | Piedritas        | 34°43'37.92"S 62°59'10.68"W | 2016 | MG792050    | D      | This study           |
| BsAs6_Tandil            | Argentina | Buenos Aires        | Tandil           | 37°21'27.00"S 59°1'23.88"W  | 2017 | MG792051    | D      | This study           |
| Cat1_Capayan            | Argentina | Catamarca           | Capayán          | 28°46'28.56"S 66°2'52.80"W  | 2015 | MG792029    | D      | This study           |
| Cat2_Tinogasta          | Argentina | Catamarca           | Tinogasta        | 28°4'59.16"S 67°34'5.16"W   | 2015 | MG792040    | D      | This study           |
| Cba1_Manfredi           | Argentina | Córdoba             | Manfredi         | 31°50'44.52"S 63°44'51.00"W | 2014 | KX574859    | D      | Bejerman et al. 2018 |
| Cba2_Calchin            | Argentina | Córdoba             | Calchín          | 31°39'55.08"S 63°11'6.72"W  | 2016 | MG792032    | D      | This study           |
| Cba3_Santa_Eufemia      | Argentina | Córdoba             | Santa Eufemia    | 33°12'24.84"S 63°17'6.36"W  | 2016 | MG792035    | D      | This study           |
| Cha_Charata             | Argentina | Chaco               | Charata          | 27°14'22.20"S 61°11'21.84"W | 2012 | MG792022    | D      | This study           |
| ER_Victoria             | Argentina | Entre Ríos          | Victoria         | 32°34'26.76"S 60°3'52.56"W  | 2011 | MG792024    | D      | This study           |
| Juj1_Palma_Sola         | Argentina | Jujuy               | Palma Sola       | 23°58'10.20"S 64°17'53.52"W | 2012 | MG792023    | D      | This study           |
| Juj2_Volcan             | Argentina | Jujuy               | Volcan           | 23°55'39.72"S 65°28'13.80"W | 2012 | MG792041    | D      | This study           |
| LP1_Ojeda               | Argentina | La Pampa            | Ojeda            | 35°2'52.08"S 63°51'20.88"W  | 2010 | MG792037    | D      | This study           |
| LP2_General_Pico        | Argentina | La Pampa            | Gral Pico        | 35°42'5.76"S 63°45'54.00"W  | 2017 | MG792042    | D      | This study           |
| LR_Villa_Castelli       | Argentina | La Rioja            | Villa Castelli   | 29°1'23.16"S 68°13'0.48"W   | 2015 | MG792027    | D      | This study           |
| Mza1_Tulumaya           | Argentina | Mendoza             | Tulumaya         | 32°42'57.60"S 68°38'6.00"W  | 2012 | MG792025    | D      | This study           |
| Mza2_Malargue           | Argentina | Mendoza             | Malargue         | 35°29'42.72"S 69°35'9.96"W  | 2014 | MG792030    | D      | This study           |
| Mza3_Monte_Coman        | Argentina | Mendoza             | Monte Coman      | 34°38'22.20"S 67°59'51.36"W | 2014 | MG792043    | D      | This study           |
| Nqn1_Chos_Malal         | Argentina | Neuquén             | Chos Malal       | 37°23'2.76"S 70°16'23.52"W  | 2014 | MG792044    | D      | This study           |
| Nqn2_Plottier           | Argentina | Neuquén             | Plottier         | 38°57'20.16"S 68°17'22.92"W | 2014 | MG792046    | D      | This study           |
| RN_Chimpay              | Argentina | Río Negro           | Chimpay          | 39°9'42.84"S 66°7'17.04"W   | 2014 | MG792052    | D      | This study           |
| Sal1_Cafayate           | Argentina | Salta               | Cafayate         | 26°3'47.88"S 65°58'18.84"W  | 2016 | MG792036    | D      | This study           |
| Sal2_J.V.Gonzalez       | Argentina | Salta               | J.V.Gonzalez     | 25°8'54.96"S 64°5'50.64"W   | 2012 | MG792048    | D      | This study           |
| SFe1_Villa_Eloisa       | Argentina | Santa Fé            | Villa Eloisa     | 32°55'35.76"S 61°30'4.32"W  | 2016 | MG792031    | D      | This study           |
| SFe2_Sunchales          | Argentina | Santa Fé            | Sunchales        | 30°58'51.24"S 61°30'39.24"W | 2010 | MG792039    | D      | This study           |
| SFe3_Emilia             | Argentina | Santa Fé            | Emilia           | 31°3'0.72"S 60°48'47.52"W   | 2016 | MG792053    | D      | This study           |
| Sgo1_Colonia_Dora       | Argentina | Santiago del Estero | Colonia Dora     | 28°39'3.96"S 63°2'54.24"W   | 2012 | MG792026    | D      | This study           |
| Sgo2_EEA_Sgo_del_Estero | Argentina | Santiago del Estero | EEA              | 28°1'20.64"S 64°13'49.80"W  | 2017 | MG792049    | D      | This study           |
| SJ_Guanacache           | Argentina | San Juan            | Guanacache       | 32°2'48.84"S 68°34'4.44"W   | 2011 | MG792028    | D      | This study           |
| SL1_La_Angelina         | Argentina | San Luis            | La Angelina      | 34°17'39.48"S 65°19'32.88"W | 2014 | MG792021    | D      | This study           |

|              |           |              |                        |                             |      |          |   |                      |
|--------------|-----------|--------------|------------------------|-----------------------------|------|----------|---|----------------------|
| SL2_Lafinur  | Argentina | San Luis     | Lafinur                | 32°5'16.44"S 65°26'26.52"W  | 2014 | MG792033 | D | This study           |
| Tuc_Tapia    | Argentina | Tucumán      | Tapia                  | 26°35'9.96"S 65°16'19.56"W  | 2012 | MG792020 | D | This study           |
| ENTZ2-3      | France    | Alsace       | Entzeim                | 48°31'31.43"N 7°38'15.54"E  | 2017 | MH603810 | A | This study           |
| VAU14_LUZ142 | France    | Occitanie    | Vauvert                | 43°34'51.60"N 4°19'5.31"E   | 2014 | KT214373 | A | Bernardo et al. 2016 |
| ASS14_Assas2 | France    | Occitanie    | Assas                  | 43°42'6.91"N 3°53'38.37"E   | 2014 | KT214352 | A | Bernardo et al. 2016 |
| SSL14_Toul1  | France    | Occitanie    | Saint Sulp. Leze       | 43°19'45.05"N 1°20'2.12"E   | 2014 | KT214354 | A | Bernardo et al. 2016 |
| SSL14_Toul7  | France    | Occitanie    | Saint Sulpice sur Leze | 43°19'45.05"N 1°20'2.12"E   | 2014 | KT214357 | A | Bernardo et al. 2016 |
| ASS14_Assas1 | France    | Occitanie    | Assas                  | 43°42'6.91"N 3°53'38.37"E   | 2014 | KT214360 | B | Bernardo et al. 2016 |
| VAU14_LUZ136 | France    | Occitanie    | Vauvert                | 43°34'51.60"N 4°19'5.31"E   | 2014 | KT214361 | B | Bernardo et al. 2016 |
| MS2-3        | France    | Occitanie    | Rodez                  | 44°20'57.80"N 2°34'33.55"E  | 2017 | MH603811 | A | This study           |
| TDV10_44-1E  | France    | Provence     | Sambuc                 | 43°30'3.19"N 4°41'20.78"E   | 2010 | KP732474 | A | Bernardo et al. 2016 |
| PB14_GS8     | France    | Provence     | Petit Bastière         | 43°39'5.61"N 4°34'29.16"E   | 2014 | KT214374 | A | Bernardo et al. 2016 |
| TDV14_44-16  | France    | Provence     | Sambuc                 | 43°30'3.19"N 4°41'20.78"E   | 2014 | KT214350 | A | Bernardo et al. 2016 |
| PB14_LUZ166  | France    | Provence     | Petit Bastière         | 43°39'5.61"N 4°34'29.16"E   | 2014 | KT214351 | A | Bernardo et al. 2016 |
| BON14_LUZ075 | France    | Provence     | Sambuc                 | 43°30'7.55"N 4°42'45.47"E   | 2014 | KT214353 | A | Bernardo et al. 2016 |
| ALB14_LUZ147 | France    | Provence     | Albaron                | 43°36'20.26"N 4°28'51.49"E  | 2014 | KT214355 | A | Bernardo et al. 2016 |
| ALB14_LUZ163 | France    | Provence     | Albaron                | 43°36'20.26"N 4°28'51.49"E  | 2014 | KT214356 | A | Bernardo et al. 2016 |
| PB14_LUZ184  | France    | Provence     | Petit Bastière         | 43°39'5.61"N 4°34'29.16"E   | 2014 | KT214359 | B | Bernardo et al. 2016 |
| GAG14_LUZ193 | France    | Provence     | Gageron                | 43°35'22.93"N 4°37'55.86"E  | 2014 | KT214362 | B | Bernardo et al. 2016 |
| PB14_LUZ182  | France    | Provence     | Petit Bastière         | 43°39'5.61"N 4°34'29.16"E   | 2014 | KT214363 | B | Bernardo et al. 2016 |
| ALB14_LUZ148 | France    | Provence     | Albaron                | 43°36'20.26"N 4°28'51.49"E  | 2014 | KT214364 | B | Bernardo et al. 2016 |
| PB14_GS4     | France    | Provence     | Petit Bastière         | 43°39'5.61"N 4°34'29.16"E   | 2014 | KT214365 | B | Bernardo et al. 2016 |
| ALB14_LUZ164 | France    | Provence     | Albaron                | 43°36'20.26"N 4°28'51.49"E  | 2014 | KT214366 | B | Bernardo et al. 2016 |
| PB14_LUZ171  | France    | Provence     | Petit Bastière         | 43°39'5.61"N 4°34'29.16"E   | 2014 | KT214367 | A | Bernardo et al. 2016 |
| PB14_LUZ188  | France    | Provence     | Petit Bastière         | 43°39'5.61"N 4°34'29.16"E   | 2014 | KT214368 | B | Bernardo et al. 2016 |
| PB14_GS6     | France    | Provence     | Petit Bastière         | 43°39'5.61"N 4°34'29.16"E   | 2014 | KT214369 | B | Bernardo et al. 2016 |
| BON14_LUZ076 | France    | Provence     | Sambuc                 | 43°30'7.55"N 4°42'45.47"E   | 2014 | KT214370 | B | Bernardo et al. 2016 |
| PB14_LUZ165  | France    | Provence     | Petit Bastière         | 43°39'5.61"N 4°34'29.16"E   | 2014 | KT214371 | A | Bernardo et al. 2016 |
| PB14_LUZ178  | France    | Provence     | Petit Bastière         | 43°39'5.61"N 4°34'29.16"E   | 2014 | KT214372 | B | Bernardo et al. 2016 |
| PB14_LUZ179  | France    | Provence     | Petit Bastière         | 43°39'5.61"N 4°34'29.16"E   | 2014 | KT214375 | B | Bernardo et al. 2016 |
| TDV12_48-2A  | France    | Provence     | Sambuc                 | 43°30'7.55"N 4°42'45.47"E   | 2012 | KT214358 | B | Bernardo et al. 2016 |
| LARAGNE5     | France    | Provence     | Laragne                | 44°17'52.89"N 5°50'20.03"E  | 2017 | MH603812 | B | This study           |
| G10-10_MAP4  | Greece    | Pella        | Apsalos                | 40°54'07.02"N 22°03'10.06"E | 2016 | MH603814 | A | This study           |
| G8-3_E221    | Greece    | Thessaloniki | Nymfopetra             | 40°41'45.08"N 23°20'59.0"E  | 2017 | MH603813 | A | This study           |
| G35-4_E215   | Greece    | Pella        | Agios Georgios         | 40°45'36.0"N 22°15'39.01"E  | 2017 | MH603815 | A | This study           |
| MS7-4        | Iran      | Fars         | Shiraz                 | 29°35'30.31"N 52°35'1.67"E  | 2015 | MH603816 | C | This study           |

|                |         |                        |                           |                             |      |          |   |                     |
|----------------|---------|------------------------|---------------------------|-----------------------------|------|----------|---|---------------------|
| SH10-4         | Iran    | Fars                   | Shiraz                    | 29°35'30.31"N 52°35'1.67"E  | 2015 | MH603817 | A | This study          |
| 38             | Iran    | Hormozgan              | Bandar Abbas              | 26°48'54.07"N 55° 6'42.37"E | 2015 | MH603828 | A | This study          |
| 6TE-2          | Iran    | Isfahan                | Fooladshahr               | 32°26'56.75"N 51°24'4.16"E  | 2016 | MH603822 | A | This study          |
| ME13           | Iran    | Isfahan                | Filor                     | 32°26'56.75"N 51°24'4.16"E  | 2015 | MH603823 | A | This study          |
| ME8            | Iran    | Isfahan                | Filor                     | 32°26'56.75"N 51°24'4.16"E  | 2015 | MH085201 | A | Davoodi et al. 2018 |
| 12UK           | Iran    | Kerman                 | Kerman                    | 29°29'6.03"N 57°38'38.06"E  | 2016 | MH085199 | C | Davoodi et al. 2018 |
| 1BJ-1          | Iran    | Kerman                 | Jiroft                    | 28°39'31.01"N 57°44'3.00"E  | 2015 | MH603824 | C | This study          |
| 2UK-2          | Iran    | Kerman                 | Kerman                    | 29°29'6.03"N 57°38'38.06"E  | 2016 | MH603821 | C | This study          |
| 51UK           | Iran    | Kerman                 | Kerman                    | 29°29'6.03"N 57°38'38.06"E  | 2016 | MH603820 | C | This study          |
| C2-2           | Iran    | Kuzestan               | Behbahan                  | 30°35'28.01"N 50°14'5.47"E  | 2015 | MH603818 | C | This study          |
| 12LO-3         | Iran    | Lorestan               | Noor Abad                 | 34° 3'52.03"N 47°58'32.96"E | 2016 | MH603819 | C | This study          |
| 2LO-Q          | Iran    | Lorestan               | Noor Abad                 | 34° 3'52.03"N 47°58'32.96"E | 2016 | MH603826 | A | This study          |
| 248-1          | Iran    | Razavi Khorasan        | Sabzevar                  | 36°12'54.64"N 57°40'4.16"E  | 2017 | MH603825 | C | This study          |
| 254            | Iran    | Razavi Khorasan        | Sabzevar                  | 36°12'54.64"N 57°40'4.16"E  | 2017 | MH603827 | C | This study          |
| Kh17-5         | Iran    | Sistan and Baluchestan | Khash                     | 28°13'53.12"N 61°11'33.94"E | 2015 | MH603829 | C | This study          |
| CO7            | Iran    | Western Azerbaijan     | Urmia                     | 37°40'55.93"N 45°23'39.59"E | 2015 | MH085200 | A | Davoodi et al. 2018 |
| I23-3          | Italy   | Emilia Romagna         | Mirandola                 | 44°52'57.63"N 11° 5'16.32"E | 2017 | MH603830 | A | This study          |
| I25-1          | Italy   | Emilia Romagna         | San Giovanni in Persiceto | 44°39'17.42"N 11°10'46.32"E | 2017 | MH603831 | A | This study          |
| I31-2          | Italy   | Emilia Romagna         | Malalbergo                | 44°42'37.27"N 11°31'16.10"E | 2017 | MH603832 | A | This study          |
| I32-1          | Italy   | Emilia Romagna         | Malalbergo                | 44°42'37.27"N 11°31'16.10"E | 2017 | MH603833 | A | This study          |
| I42-5J         | Italy   | Tuscany                | Prato                     | 43°54'9.90"N 11° 5'52.42"E  | 2017 | MH603834 | A | This study          |
| I44-13         | Italy   | Liguria                | Poggi                     | 44° 4'30.32"N 8°11'12.96"E  | 2017 | MH603835 | A | This study          |
| COURM2         | Italy   | Aosta Valley           | Courmayeur                | 45°46'56.18"N 6°58'14.84"E  | 2017 | MH603836 | A | This study          |
| J4-3_JoAI26-17 | Jordan  | Balqa                  | Deir Alla                 | 32°11'20.00"N 35°36'11.00"E | 2017 | MH603837 | A | This study          |
| J6-5_JoAI28-17 | Jordan  | Balqa                  | Deir Alla                 | 32°11'20.00"N 35°36'11.00"E | 2017 | MH020805 | A | Kumari et al. 2018  |
| J8-1_JoAI30-17 | Jordan  | Balqa                  | Deir Alla                 | 32°11'20.00"N 35°36'11.00"E | 2017 | MH603838 | A | This study          |
| J9-1_JoAI31-17 | Jordan  | Irbid                  | Ar Ramtha                 | 32°33'39.32"N 36° 0'31.31"E | 2017 | MH603839 | A | This study          |
| L2-6_LAI2_17   | Lebanon | Beka'a                 | Terbol                    | 33°49'3.90"N 35°59'1.38"E   | 2017 | MH603840 | A | This study          |
| L3-1_LAI3_17   | Lebanon | Beka'a                 | Terbol                    | 33°49'3.90"N 35°59'1.38"E   | 2017 | MH603841 | A | This study          |
| L5-6_LAI22_17  | Lebanon | Beka'a                 | Mansoura                  | 33°40'52.10"N 35°48'56.18"E | 2017 | MH020806 | A | Kumari et al. 2018  |
| ES8-6          | Spain   | Andalusia              | Huétor Tájar              | 37°11'50.52"N 4° 2'9.96"W   | 2017 | MH603842 | A | This study          |
| ES12-8         | Spain   | Andalusia              | Huétor Tájar              | 37°11'50.28"N 4° 2'10.50"W  | 2017 | MH603843 | A | This study          |
| ES17-3         | Spain   | Andalusia              | Huétor Tájar              | 37°11'51.12"N 4° 1'53.52"W  | 2017 | MH603844 | A | This study          |
| ES25-3         | Spain   | Andalusia              | Láchar                    | 37°11'47.70"N 3°51'39.00"W  | 2017 | MH603845 | A | This study          |
| ES26-4         | Spain   | Andalusia              | Láchar                    | 37°11'47.76"N 3°51'39.12"W  | 2017 | MH603846 | A | This study          |
| ES32-3         | Spain   | Andalusia              | Chauchina                 | 37°11'52.14"N 3°46'52.62"W  | 2017 | MH603847 | A | This study          |

|                 |         |           |                   |                             |      |          |   |                    |
|-----------------|---------|-----------|-------------------|-----------------------------|------|----------|---|--------------------|
| ES34-2          | Spain   | Andalusia | Chauchina         | 37°11'52.02"N 3°46'52.56"W  | 2017 | MH603848 | B | This study         |
| ES36-5          | Spain   | Andalusia | Chauchina         | 37°11'51.96"N 3°46'52.62"W  | 2017 | MH603849 | A | This study         |
| ES44-6          | Spain   | Andalusia | Chauchina         | 37°11'54.36"N 3°47'20.10"W  | 2017 | MH603850 | A | This study         |
| ES52-18         | Spain   | Andalusia | Chauchina         | 37°11'52.68"N 3°47'31.26"W  | 2017 | MH603851 | B | This study         |
| ES53-1          | Spain   | Andalusia | Chauchina         | 37°11'52.68"N 3°47'31.38"W  | 2017 | MH603852 | A | This study         |
| S2-9_SyAl35-17  | Syria   | Hama      | Mahrusah          | 35° 8'37.90"N 36°25'29.66"E | 2017 | MH603853 | A | This study         |
| S4-2_SyAl37-17  | Syria   | Hama      | Mahrusah          | 35° 8'37.90"N 36°25'29.66"E | 2017 | MH020803 | A | Kumari et al. 2018 |
| S7-1_SyAl40-17  | Syria   | Hama      | Khan Gelmidon     | 35° 8'37.90"N 36°25'29.66"E | 2017 | MH603854 | A | This study         |
| S12-3_SyAl45-17 | Syria   | Hama      | Jeb Ramleh        | 35° 3'49.44"N 36°20'30.06"E | 2017 | MH603855 | A | This study         |
| T1-1_TuAl5_17   | Tunisia | Ariana    | Qal'at Al Andalus | 37° 2'10.52"N 10° 7'36.80"E | 2017 | MH603856 | A | This study         |
| T2-1_TuAl6_17   | Tunisie | Ariana    | Qal'at Al Andalus | 37° 2'10.52"N 10° 7'36.80"E | 2017 | MH020804 | A | Kumari et al. 2018 |
| T4-1_TuAl8_17   | Tunisia | Ariana    | Qal'at Al Andalus | 37° 2'10.52"N 10° 7'36.80"E | 2017 | MH603857 | A | This study         |
| T6-1_TuAl10_17  | Tunisia | Ariana    | Qal'at Al Andalus | 37° 2'10.52"N 10° 7'36.80"E | 2017 | MH603858 | A | This study         |
| T12-1_TuAl16_17 | Tunisia | Ariana    | Qal'at Al Andalus | 37° 2'10.52"N 10° 7'36.80"E | 2017 | MH603859 | A | This study         |
| T16-1_TuAl20_17 | Tunisia | Béja      | Béja              | 36°43'59.95"N 9°11'3.72"E   | 2017 | MH603860 | A | This study         |
